1                    Mechanics defines the spatial pattern of compensatory proliferation

2

3            Takumi Kawaue<sup>\*</sup>, Ivan Yow<sup>1\*</sup>, Anh Phuong Le<sup>1</sup>, Yuting Lou<sup>1</sup>, Mavis Loberas<sup>1</sup>, Murat

4            Shagirov<sup>1</sup>, Jacques Prost<sup>2</sup>, Tetsuya Hiraiwa<sup>1</sup>, Benoit Ladoux<sup>3</sup>, Yusuke Toyama<sup>1,4\*\*</sup>

5

6    1 Mechanobiology Institute, National University of Singapore, Singapore

7    2 Physico Chimie Curie, Institut Curie, CNRS, UMR 168, Paris 75005, France

8    3 Institut Jacques Monod (IJM), Université de Paris and CNRS UMR 7592, Paris,

9    France

10   4 Department of Biological Sciences, National University of Singapore, Singapore

11

12   \* These authors equally contributed to this work

13   \*\* Author for correspondence (dbsty@nus.edu.sg)

14

15

16 **Abstract**

17 The number of cells in tissues is tightly controlled by cell division and cell death, and  
18 misregulation of cell numbers could lead to pathological conditions such as cancer. To  
19 maintain cell numbers in a tissue, a cell elimination process named programmed cell  
20 death or apoptosis, stimulates the proliferation of neighboring cells. This mechanism is  
21 called apoptosis-induced compensatory proliferation, which was originally reported  
22 more than 40 years ago. While only a limited number of the neighboring cells need to  
23 divide to compensate for apoptotic cell loss, the mechanisms that select cells for  
24 undergoing division remain an open question. Here we found that the spatial  
25 inhomogeneity in mechanotransduction through a growth-promoting transcription co-  
26 activator Yes-associated protein (YAP) in the neighboring tissue, accounts for the  
27 inhomogeneity of compensatory proliferation. Such inhomogeneous  
28 mechanotransduction arises from the combination of the non-uniform distribution of  
29 nuclear size, which is inherent in tissues, and the non-uniform pattern of mechanical  
30 force applied to the neighboring cells upon apoptosis. Our findings from a mechanical  
31 perspective complement the current biochemical understanding of compensatory growth  
32 and provide additional insights into cellular functions of how tissue precisely maintains  
33 its homeostasis.

34

35

## 36 **Introduction**

37 Apoptosis, or programmed cell death, is a mechanism by which unnecessary, aged, or  
38 damaged cells are eliminated [1]. To maintain the homeostatic cell number in  
39 epithelium and organs, a mechanism by which an apoptotic event induces the  
40 proliferation of neighboring cells, called apoptosis-induced compensatory proliferation,  
41 takes place. This phenomenon of compensatory proliferation was originally described  
42 more than 40 years ago [2]. Haynie and Bryant investigated how *Drosophila* imaginal  
43 wing disc responds to damage induced by x-ray irradiation. Although irradiation of  
44 *Drosophila* larvae killed ~60% of the cells in the wing disc, the remaining cells were  
45 able to recover and develop as adult wings with normal structure and size. This  
46 suggested that there are cellular mechanisms that promote cell division upon tissue  
47 damage to compensate the cell loss. Since then, the mechanisms of compensatory  
48 proliferation, especially the role of mitogenic signals secreted by the apoptotic cell,  
49 have been investigated [3,4]. For instance, in *Drosophila*, it is well characterized that  
50 the secretion of Decapentaplegic (Dpp) and Wnt/Wingless (Wg) mitogens from the  
51 apoptotic cell results in cell proliferation in neighboring cells [5–9]. In mice [10] and a  
52 mammalian cell line [11], the pro-inflammatory metabolite, Prostaglandin E2 (PGE2),  
53 is produced and secreted by the apoptotic cell and stimulates cell growth. Notably, it is  
54 sufficient for a limited number of the neighboring cells to divide to compensate for the  
55 cell loss due to apoptosis. This raises a possibility that biochemical signals are crucial,  
56 but may not be solely responsible, to explain this spatial inhomogeneity of  
57 compensatory proliferation. More recently, the apoptotic process, especially in the

58 context of cell extrusion, has been associated with mechanical force. An apoptotic cell is  
59 expelled from a tissue through the contraction of an actomyosin cable formed in the  
60 dying cell as well as in the neighboring cells, or via lamellipodium crawling by adjacent  
61 cells [12–16]. This cell extrusion process further alters the surrounding tissue tension  
62 and morphogenesis [17–20]. Here we considered the mechanical force associated with  
63 an apoptotic process and elucidate how only a small number of cells around an  
64 apoptotic cell undergo cell division.

65

## 66 **Results**

### 67 **Mechanical force propagation and stretching in the neighboring tissue upon** 68 **apoptosis**

69 To understand how an apoptotic event mechanically influences neighboring cells, we  
70 established an *in vitro* platform to quantitatively measure the changes in mechanical  
71 force among neighboring tissue upon cell death in Madin-Darby Canine Kidney  
72 (MDCK) epithelial cells (Fig. 1A). DNA damage and subsequent apoptotic cell  
73 extrusion (Fig. 1B) in the desired cell were induced by using UV laser [14,21] among a  
74 tissue that was cultured on deformable substrates made from elastic  
75 polydimethylsiloxane (PDMS) gel with fluorescent beads [22]. Upon the induction of  
76 apoptosis, a wave-like propagation of bead displacement, which is the proxy for  
77 substrate deformation, was observed (Movie 1). Particle image velocimetry (PIV)  
78 analysis of the movement of the fluorescent beads (Fig. 1C) showed that initially, the  
79 beads moved away from the apoptotic cell (red,  $t=5\text{min}$  in Fig. 1C) and this

80 displacement was largest at the nearest neighboring cells (Fig. 1H, Methods). In  
81 addition to the outward movement, the inward movement of the substrate emerged at  
82 the region close to the extrusion site (blue, Fig. 1C). To quantitatively understand the  
83 substrate deformation, we plotted the kymograph of the average radial velocity of the  
84 beads as a function of distance from the apoptotic cell (Fig. 1D, Methods). In-between  
85 the outwardly and inwardly moving substrate, there was a small region of substrate that  
86 showed transiently static behavior (i.e. no or balanced inward and outward movement),  
87 and this transiently static region shifted away from the extrusion site over time (white,  
88 Fig. 1D). We adopted this static region as one of the hallmarks of substrate deformation  
89 and found that the wave propagated a distance of  $21.3 \pm 2.3 \mu\text{m}$  (mean  $\pm$  s.e.m.) away from  
90 the dead cells in an hour (Fig. 1G). To understand the cause of the substrate deformation,  
91 we treated the tissue with the Rac1 inhibitor NSC23766 to inhibit lamellipodial cell  
92 crawling. Lamellipodia crawling is known to occur in neighboring cells and contributes  
93 to apoptotic cell extrusion [14,16] and to deform the substrate to the direction opposite  
94 to the cell migration. Although we predicted that NSC23755 treatment would diminish  
95 substrate deformation upon apoptosis, we found that the wave propagation increased to  
96 a distance of  $42.8 \pm 2.4 \mu\text{m}$  (mean  $\pm$  s.e.m.) in an hour (Fig. 1E-G, Movie 2). We then  
97 tracked the tissue dynamics by differential interference contrast (DIC) imaging and  
98 found that the cells moved away from the dead cell in both control and NSC23766-  
99 treated tissue (Fig. 1I-J, Movie 3). We reasoned that the release of epithelial tissue pre-  
100 tension, which is an inherent tissue characteristic generated by actomyosin-mediated  
101 contractility, leads to the relaxation and the outward movement of the tissue around the

102 apoptotic cell. Indeed, we previously reported a reduction of the adherens junction  
103 molecule E-cadherin between apoptotic and neighboring cells after caspase-3 activation  
104 in the apoptotic cell in *Drosophila* epithelia [13] and MDCK cells [23]. This reduction  
105 of E-cadherin leads to disengagement of the cell-cell junction between apoptotic and  
106 neighboring cells, and a release of the tissue pre-tension [13]. To further validate our  
107 reasoning, we compared the tissue pre-tension between control and NSC23766-treated  
108 monolayer by laser ablation at the cell-cell junction [24] without induction of apoptosis.  
109 The junctional tension in the NSC23766-treated tissue is higher than that of the control  
110 tissue (Fig. S1A-C), which is consistent with the larger wave propagation in NSC23766-  
111 treated tissue. We further found that the relative position between the focal adhesions of  
112 the neighboring cells and the beads embedded in the substrate did not change drastically  
113 during wave propagation, indicating there is minimal sliding between tissue and the  
114 substrate during wave propagation (Fig. S1D). Together, our data reveals that the tissue  
115 moves away from the dead cell due to the relaxation of the tissue pre-tension upon  
116 apoptosis. The wave-like dynamics of the substrate gel caused by the release of the pre-  
117 tension of tissue upon apoptosis can be explained by a physical model based on a linear  
118 elasticity theory [25].

119         A kymograph of the radial average velocity of the beads showed that there was  
120 inward movement of the substrate toward the apoptotic cell (blue in Fig. 1C-F). We  
121 speculate that this is, in part, due to the formation and the contraction of the actomyosin  
122 cable in the neighboring cells [12,16,23]. The appearance of the inward movement  
123 emerged around 5~10min after the initial outward movement, consistent with the timing

124 of formation and initiation of actomyosin cable contraction. These observations imply  
125 that the neighboring cells are stretched by apoptotic cell extrusion. Indeed, measuring  
126 the strain of the neighboring cells showed that the nearest neighbor cells underwent  
127  $16.2 \pm 2.3\%$  (mean  $\pm$  s.e.m.) stretch, which is significantly larger than cells further away  
128 from the dead cell (Fig. 1K-L). Taken together, we conclude that the cells in the vicinity  
129 of the apoptotic cell experience a tensile stretching, which is due to the combination of  
130 tissue relaxation and apoptosis-associated actomyosin cable contraction.

131

132 **A small number of neighboring cells show nuclear translocation of YAP and cell**  
133 **cycle progression upon apoptosis**

134 To address whether this stretching of the neighboring tissue would further influence the  
135 biochemical signaling within the surrounding cells, we examined the dynamics of Yes-  
136 associated protein (YAP), a growth-promoting transcription co-activator and an effector  
137 of the Hippo pathway [26]. YAP is also known as a mechanotransducer which  
138 transforms the physical stimuli that cells experience through mechanosensing into  
139 intracellular biochemical signals [27]. Upon mechanical stimuli, YAP translocates into  
140 the nucleus, which further promotes downstream transcriptional programs including cell  
141 proliferation [28]. We imaged the localization of YAP in the neighboring cells of an  
142 apoptotic cell by using MDCK cells that stably express YAP-GFP (Methods), and found  
143 that only a fraction of neighboring cells exhibited nuclear translocation of YAP (Fig.  
144 2A-B, Movie 4). To further understand the consequence of apoptosis-associated YAP  
145 nuclear translocation, we imaged the cell cycle progression of the neighboring cells by

146 using MDCK cells with the cell cycle reporter Fluorescent Ubiquitination-based Cell  
147 Cycle Indicator, FUCCI [29]. The cells were first serum-starved for 24 hours to  
148 synchronize the cell cycle at G1 phase. Prior to imaging, serum-free media was replaced  
149 with fresh media containing serum. We found that only a few neighboring cells  
150 underwent cell cycle progression from G1 to S phase at around 6-7 hours after apoptosis  
151 (Fig. 2C-E, Movie 5). The nearest neighbor cells and next-nearest neighbor cells to the  
152 apoptotic cell had a higher probability of mitosis, compared to cells further away from  
153 the dying cell (Fig. 2F-G) and underwent mitosis at around 16-18 hours after apoptosis  
154 (Fig. 2H). Such characteristics are distinct from the cells irrelevant to and further away  
155 from apoptosis (Fig. 2F-H). Our data consistently showed that only a few neighboring  
156 cells undergo cell division upon apoptosis.

157

158 **Spatial inhomogeneities in force propagation and nuclear size define which of the**  
159 **neighboring cells undergo cell division following apoptosis**

160 To uncover what defines this spatial inhomogeneity of cell division, we sought out  
161 factors that are not homogeneous in space. First, the substrate deformation as measured  
162 by bead displacement is spatially inhomogeneous (Fig. 1C, 3A). We noticed that cells  
163 that underwent cell cycle progression upon apoptosis spatially correlated to the region  
164 with large displacement (Fig. 3A), indicating cells that experienced a larger  
165 displacement and consequently underwent more stretching have a higher chance to  
166 undergo cell division. Second, the spatial distribution of the size of the nucleus is  
167 spatially inhomogeneous. We found that the cells that underwent cell cycle progression



168 upon apoptosis tended to have a larger nucleus at the beginning of apoptosis (Fig. 3B).  
169 To address whether these two spatially inhomogeneous factors, i.e., substrate  
170 deformation and nucleus size, are both required for cell proliferation, we simultaneously  
171 monitored bead displacement, nucleus size, and YAP localization. We found a case of 2  
172 neighboring cells that both had a large nucleus (arrowhead and arrow, Fig. 3C), however  
173 only the cell located in the region that underwent large bead displacement showed YAP  
174 nuclear translocation (arrowhead, Fig. 3C). To further solidify our observation, we  
175 analyzed more than 100 cells that were in the vicinity of apoptotic cells (Fig. 3D). Only  
176 cells with a large nucleus that experienced large bead displacement showed clear YAP  
177 nuclear translocation (red, Fig. 3D). In contrast, cells with a large nucleus that  
178 experienced small bead displacement, or any cells with a small nucleus, did not show  
179 clear YAP nuclear translocation (blue in Fig. 3D). In addition, by analyzing the  
180 relationship between strain (Fig. 1K), nucleus size, and cell cycle progression measured  
181 by Fucci, we found that only the cells with a large nucleus that experienced large  
182 strain underwent cell division (red, Fig. 3E). To rationalize how strain and nuclear size  
183 regulate YAP nuclear translocation and cell proliferation, we measured the number of  
184 nuclear pore complexes depending on nuclear size (Fig. 3F-G). The nuclear pore  
185 complex is a known structure to transport YAP from the cytoplasm to the nucleus in a  
186 tension-dependent manner [30]. We found that the number of nuclear pores increases  
187 with the size of the nucleus (Fig. 3G), and speculated that the larger nuclear size helps  
188 nuclear translocation of YAP upon mechanical stretching. Together, we found that the  
189 spatially limited cell division around the apoptotic process is defined by the spatial

190 inhomogeneity of pre-tension release (measured by bead displacement) which leads to  
191 the strain of a cell, and the spatial inhomogeneity of nuclear size.

192 To understand to what extent the difference in nuclear size at the beginning of  
193 apoptosis (Fig. 3D-E) represented the intrinsic inhomogeneity of nuclear size among  
194 tissue, we measured the changes in nuclear size during cell cycle progression. The  
195 nucleus size typically increased ~10% during progression from G1 to G2 phase (Fig.  
196 S2A). Moreover, we observed a wide distribution in nuclear size within a tissue with a  
197 FWHM of 50.3 $\mu$ m (Fig. S2B). We thus conclude that the difference in nuclear size  
198 between cells that divided or not (Fig. 3E) and between cells that showed YAP nuclear  
199 translocation or not (Fig. 3D) did not predominantly arise from the changes in the  
200 nuclear size during cell division, but from the intrinsic inhomogeneity of nuclear size  
201 among tissue.

202

### 203 **Compensatory proliferation requires force propagation through the substrate**

204 It has been shown that biochemical signaling, including mitogenic signaling, from the  
205 apoptotic cell, contributes to compensatory proliferation [3,4]. To understand to what  
206 extent the mechanical factors showed earlier play roles in compensatory proliferation in  
207 addition to mitogenic signaling, we aimed to modulate force propagation without  
208 altering the biochemical interaction between apoptotic and neighboring cells. To this  
209 end, we did not change the mechanical properties of the PDMS substrate, but altered the  
210 size of the tissue, or the friction between the gel substrate and the glass-bottom Petri  
211 dish. We first altered the size of the tissue by using microcontact printing technology to

212 reduce the pre-tension of the tissue (Methods, Fig. 4A). The size of the mini-tissue was  
213 reduced until the bead displacement diminished. A mini-tissue of 100  $\mu\text{m}$  diameter (Fig.  
214 4A) showed a reduced bead displacement (Fig. 4B-C, Movie 6). Under this condition,  
215 the neighboring cells failed to translocate YAP into the nucleus (Fig. 4D-E, Movie 6)  
216 regardless of nucleus size (Fig. 4F) upon induction of apoptosis in a cell in the middle  
217 of a mini-tissue. Our theoretical model based on linear elasticity theory [25] predicted  
218 that the gel substrate is weakly adhered to the surface of the glass-bottom Petri dish (Fig.  
219 1A) and that increasing this adhesion would suppress the wave propagation. To test this  
220 prediction, the dish was silanized with 3-aminopropyl trimethoxysilane (APTES) to  
221 increase adhesion of the gel to the glass (Methods, Fig. 4G). We found that under this  
222 condition the bead displacement upon apoptosis was diminished (Fig. 4H-I, Movie 7)  
223 and YAP nuclear translocation in the neighboring cells was abolished regardless of  
224 nuclear size (Fig. 4J-L, Movie 7). In addition, cell cycle progression in neighboring  
225 cells surrounding an apoptotic cell was also abolished with APTES treatment (Fig. 4M-  
226 N). Taken together, our data further support the idea that modulation of the mechanical  
227 status of the neighboring cells of the apoptotic cell through the substrate is required for  
228 the nuclear translocation of YAP, cell cycle progression, and cytokinesis of the  
229 neighboring cells.

230

## 231 **Discussion and conclusion**

232 In summary, we answered a long-standing question of how only a small number of cells  
233 around an apoptotic cell undergo cell division to sustain the homeostasis of the cell

234 number in a tissue (Fig. 4O). The spatial inhomogeneity of cell division in response to  
235 the apoptotic process is associated with inhomogeneous mechanotransduction,  
236 characterized by the nuclear translocation of YAP, and arises from the combination of  
237 the large strain and the large nuclear size of the neighboring cells. One obvious question  
238 is whether mechanotransduction in the neighboring cells is required for compensatory  
239 proliferation. Suppression of mechanical stimulus without altering the cell-cell contact  
240 between apoptotic and neighboring cells resulted in a lack of mechanotransduction and  
241 cell division (Fig. 4A-N). These results highlighted that force propagation through the  
242 substrate, which has been overlooked, plays a significant role in defining the spatial  
243 pattern of compensatory proliferation. Our theoretical model [25] suggested that the  
244 experimental condition where the gel substrate is weakly adhered to a glass-bottom dish  
245 (Fig. 1A) has mechanical features analogous to layers of tissue with viscoelasticity. We  
246 speculate that stratified epithelium, such as skin [31], shares similar mechanisms during  
247 compensatory proliferation. In contrast, the gel substrate that strongly adhered to a  
248 glass-bottom dish (Fig. 4G) behaves as an elastic substrate, which has been used for  
249 traction force microscopy [21].

250 Another key question is how biochemical signaling, including mitogenic signaling, that  
251 emerges from the apoptotic process, contributes to compensatory proliferation. It has  
252 been shown recently that extracellular-signal-regulated kinase (ERK) is activated in  
253 most of the neighboring cells upon apoptosis and acts as a survival factor for these cells  
254 [32,33]. Our data support the idea that mitogenic signals secreted from the apoptotic cell  
255 are crucial as demonstrated before [5–11], but not solely sufficient, to explain the

256 spatially inhomogeneous nature of compensatory proliferation. However, we cannot rule  
257 out the possibility that there are additional mechanisms that could suppress cell division  
258 of neighboring cells next to the dividing cell. For instance, a paralog of YAP,  
259 transcriptional coactivator with a PDZ-binding motif (TAZ), is shown to be excluded  
260 from the nucleus by extrinsic compression and to cause lateral inhibition in cell fate  
261 specification [34]. Indeed, the neighboring cells that experienced a negative strain, i.e.,  
262 compression, did not undergo cell division (Fig. 3E). Together, our findings  
263 complement the current biochemical understanding of apoptosis-induced compensatory  
264 growth and provide additional insights into cellular functions of how tissue precisely  
265 maintains homeostasis. Such apoptosis-induced proliferation has been found in a wide  
266 range of cancers, including breast cancer, melanoma, and glioma cells [35–38]. Our  
267 findings provide a new mechanical perspective to understand not only tissue  
268 homeostasis but also tumor pathology.

269

270

429 **References**

- 430 1. Fuchs Y, Steller H: Programmed cell death in animal development and disease.  
431 *Cell* 2011, 147:742–758.
- 432 2. Haynie JL, Bryant PJ: The effects of X-rays on the proliferation dynamics of cells  
433 in the imaginal wing disc of *Drosophila melanogaster*. *Wilhelm Rouxs Arch Dev*  
434 *Biol* 1977, 183:85–100.
- 435 3. Fogarty CE, Bergmann A: The Sound of Silence: Signaling by Apoptotic Cells.  
436 *Curr Top Dev Biol* 2015, 114:241–265.
- 437 4. Fuchs Y, Steller H: Live to die another way: modes of programmed cell death and  
438 the signals emanating from dying cells. *Nat Rev Mol Cell Biol* 2015, 16:329–344.
- 439 5. Fan Y, Bergmann A: Distinct mechanisms of apoptosis-induced compensatory  
440 proliferation in proliferating and differentiating tissues in the *Drosophila* eye. *Dev*  
441 *Cell* 2008, 14:399–410.
- 442 6. Morata G, Shlevkov E, Pérez-Garijo A: Mitogenic signaling from apoptotic cells  
443 in *Drosophila*. *Dev Growth Differ* 2011, 53:168–176.
- 444 7. Pérez-Garijo A, Martín FA, Morata G: Caspase inhibition during apoptosis causes  
445 abnormal signalling and developmental aberrations in *Drosophila*. *Dev Camb Engl*  
446 2004, 131:5591–5598.
- 447 8. Ryoo HD, Gorenc T, Steller H: Apoptotic cells can induce compensatory cell  
448 proliferation through the JNK and the Wingless signaling pathways. *Dev Cell* 2004,  
449 7:491–501.
- 450 9. Smith-Bolton RK, Worley MI, Kanda H, Hariharan IK: Regenerative growth in  
451 *Drosophila* imaginal discs is regulated by Wingless and Myc. *Dev Cell* 2009,  
452 16:797–809.
- 453 10. Castellone MD, Teramoto H, Williams BO, Druey KM, Gutkind JS: Prostaglandin  
454 E2 promotes colon cancer cell growth through a Gs-axin-beta-catenin signaling  
455 axis. *Science* 2005, 310:1504–1510.
- 456 11. Li F, Huang Q, Chen J, Peng Y, Roop D, Bedford JS, Li C-Y: Apoptotic Cells  
457 Activate the “Phoenix Rising” Pathway to Promote Wound Healing and Tissue  
458 Regeneration. *Sci Signal* 2010, 3:ra13.
- 459 12. Rosenblatt J, Raff MC, Cramer LP: An epithelial cell destined for apoptosis  
460 signals its neighbors to extrude it by an actin- and myosin-dependent mechanism.  
461 *Curr Biol CB* 2001, 11:1847–1857.

- 462 13. Teng X, Qin L, Le Borgne R, Toyama Y: Remodeling of adhesion and modulation  
463 of mechanical tensile forces during apoptosis in *Drosophila* epithelium.  
464 *Development* 2017, 144:95–105.
- 465 14. Kocgozlu L, Saw TB, Le AP, Yow I, Shagirov M, Wong E, Mège RM, Lim CT,  
466 Toyama Y, Ladoux B: Epithelial Cell Packing Induces Distinct Modes of Cell  
467 Extrusions. *Curr Biol* 2016, 26:2942–2950.
- 468 15. Michael M, Meiring JCM, Acharya BR, Matthews DR, Verma S, Han SP, Hill MM,  
469 Parton RG, Gomez GA, Yap AS: Coronin 1B Reorganizes the Architecture of F-  
470 Actin Networks for Contractility at Steady-State and Apoptotic Adherens Junctions.  
471 *Dev Cell* 2016, 37:58–71.
- 472 16. Le AP, Rupprecht J-F, Mège R-M, Toyama Y, Lim CT, Ladoux B: Adhesion-  
473 mediated heterogeneous actin organization governs apoptotic cell extrusion. *Nat*  
474 *Commun* 2021, 12:397.
- 475 17. Toyama Y, Peralta XG, Wells AR, Kiehart DP, Edwards GS: Apoptotic force and  
476 tissue dynamics during *Drosophila* embryogenesis. *Science* 2008, 321:1683–1686.
- 477 18. Monier B, Gettings M, Gay G, Mangeat T, Schott S, Guarner A, Suzanne M:  
478 Apico-basal forces exerted by apoptotic cells drive epithelium folding. *Nature*  
479 2015, 518:245–248.
- 480 19. Teo JL, Tomatis VM, Coburn L, Legendijk AK, Schouwenaar I-M, Budnar S, Hall  
481 TE, Verma S, McLachlan RW, Hogan BM, et al.: Src kinases relax adherens  
482 junctions between the neighbors of apoptotic cells to permit apical extrusion. *Mol*  
483 *Biol Cell* 2020, 31:2557–2569.
- 484 20. Teng X, Toyama Y: Apoptotic force: Active mechanical function of cell death  
485 during morphogenesis. *Dev Growth Differ* 2011, 53:269–276.
- 486 21. Saw TB, Doostmohammadi A, Nier V, Kocgozlu L, Thampi S, Toyama Y, Marcq P,  
487 Lim CT, Yeomans JM, Ladoux B: Topological defects in epithelia govern cell  
488 death and extrusion. *Nature* 2017, 544:212–216.
- 489 22. Discher DE, Janmey P, Wang Y-L: Tissue cells feel and respond to the stiffness of  
490 their substrate. *Science* 2005, 310:1139–1143.
- 491 23. Thomas M, Ladoux B, Toyama Y: Desmosomal Junctions Govern Tissue Integrity  
492 and Actomyosin Contractility in Apoptotic Cell Extrusion. *Curr Biol* 2020,  
493 30:682-690.e5.
- 494 24. Hara Y, Shagirov M, Toyama Y: Cell Boundary Elongation by Non-autonomous

- 495 Contractility in Cell Oscillation. *Curr Biol* 2016, 26:2388–96.
- 496 25. Lou Y, Kawaue T, Yow I, Toyama Y, Prost J, Hiraiwa T: Tissue can generate  
497 propagating long-range forces on weakly adhesive substrate. *bioRxiv* 2021,
- 498 26. Sudol M: YAP1 oncogene and its eight isoforms. *Oncogene* 2013, 32:3922.
- 499 27. Dupont S, Morsut L, Aragona M, Enzo E, Giulitti S, Cordenonsi M, Zanconato F,  
500 Le Digabel J, Forcato M, Bicciato S, et al.: Role of YAP/TAZ in  
501 mechanotransduction. *Nature* 2011, 474:179–183.
- 502 28. Dong J, Feldmann G, Huang J, Wu S, Zhang N, Comerford SA, Gayyed MF,  
503 Anders RA, Maitra A, Pan D: Elucidation of a Universal Size-Control Mechanism  
504 in *Drosophila* and Mammals. *Cell* 2007, 130:1120–1133.
- 505 29. Sakaue-Sawano A, Kurokawa H, Morimura T, Hanyu A, Hama H, Osawa H,  
506 Kashiwagi S, Fukami K, Miyata T, Miyoshi H, et al.: Visualizing spatiotemporal  
507 dynamics of multicellular cell-cycle progression. *Cell* 2008, 132:487–498.
- 508 30. Elosegui-Artola A, Andreu I, Beedle AEM, Lezamiz A, Uroz M, Kosmalka AJ,  
509 Oria R, Kechagia JZ, Rico-Lastres P, Le Roux A-L, et al.: Force Triggers YAP  
510 Nuclear Entry by Regulating Transport across Nuclear Pores. *Cell* 2017, 171:1397-  
511 1410.e14.
- 512 31. Mesa KR, Kawaguchi K, Cockburn K, Gonzalez D, Boucher J, Xin T, Klein AM,  
513 Greco V: Homeostatic Epidermal Stem Cell Self-Renewal Is Driven by Local  
514 Differentiation. *Cell Stem Cell* 2018, 23:677-686.e4.
- 515 32. Gagliardi PA, Dobrzyński M, Jacques M-A, Dessauges C, Ender P, Blum Y,  
516 Hughes RM, Cohen AR, Pertz O: Collective ERK/Akt activity waves orchestrate  
517 epithelial homeostasis by driving apoptosis-induced survival. *Dev Cell* 2021,  
518 doi:10.1016/j.devcel.2021.05.007.
- 519 33. Valon L, Davidović A, Levillayer F, Villars A, Chouly M, Cerqueira-Campos F,  
520 Levayer R: Robustness of epithelial sealing is an emerging property of local ERK  
521 feedback driven by cell elimination. *Dev Cell* 2021,  
522 doi:10.1016/j.devcel.2021.05.006.
- 523 34. Xia P, Gütl D, Zheden V, Heisenberg C-P: Lateral Inhibition in Cell Specification  
524 Mediated by Mechanical Signals Modulating TAZ Activity. *Cell* 2019, 176:1379-  
525 1392.e14.
- 526 35. Donato AL, Huang Q, Liu X, Li F, Zimmerman M, Li C-Y: Caspase 3 promotes  
527 surviving melanoma tumor cell growth after cytotoxic therapy. *J Invest Dermatol*



- 528           2014, 134:1686–1692.
- 529   36. Kurtova AV, Xiao J, Mo Q, Pazhanisamy S, Krasnow R, Lerner SP, Chen F, Roh  
530       TT, Lay E, Ho PL, et al.: Blocking PGE2-induced tumour repopulation abrogates  
531       bladder cancer chemoresistance. *Nature* 2015, 517:209–213.
- 532   37. Mao P, Smith L, Xie W, Wang M: Dying endothelial cells stimulate proliferation of  
533       malignant glioma cells via a caspase 3-mediated pathway. *Oncol Lett* 2013,  
534       5:1615–1620.
- 535   38. Ryoo HD, Bergmann A: The role of apoptosis-induced proliferation for  
536       regeneration and cancer. *Cold Spring Harb Perspect Biol* 2012, 4:a008797.
- 537

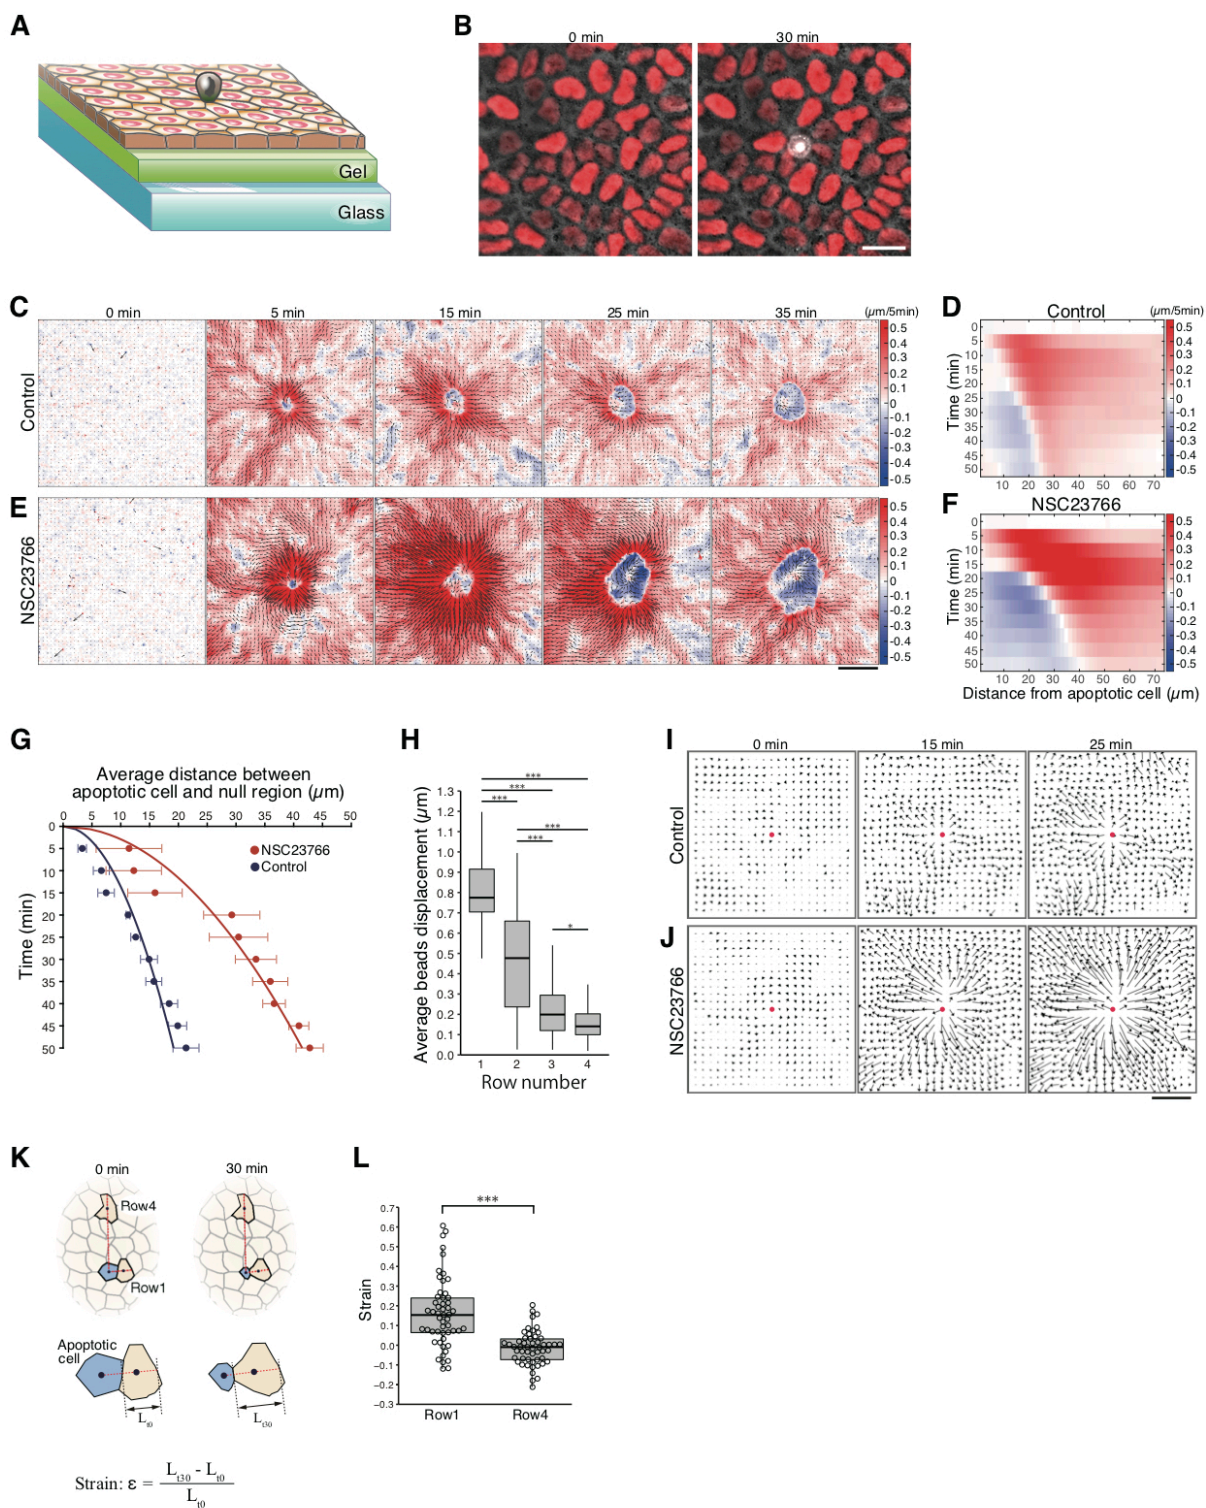

**Figure 1.**

(A) Diagram of a confluent MDCK monolayer tissue on the gel-coated glass dish. See Methods. Grey, apoptotic extruding cell; green, silicone gel coated with fibronectin, which overlays on the glass bottom dish.

(B) Representative snapshots of apoptotic cell extrusion within an MDCK monolayer.

(C and E) Representative time series showing heat map with vectors of radial beads displacement after laser induction of apoptosis for control and NSC23766 treated condition. The color bar indicates the magnitude of the radial outward (red) and inward (blue) displacements in  $\mu\text{m}$ .

(D and F) Kymograph of average radial beads displacement in C and E.

(G) Average distance from the center of apoptotic cell to the static region where is the boundary between outward and inward vectors. Time 0 min represents the time at laser induction of apoptosis.  $n = 5$  ROIs (control),  $n = 5$  ROIs (NSC23766).

(H) Average beads displacement 1 min after laser induction for each row from the apoptotic cell. Data are mean  $\pm$  s.d.; \* $P < 0.05$  and \*\*\* $P < 0.001$ , one-way ANOVA and Levene test followed by Tukey–Kramer test.  $n = 7$  ROIs in 3 independent experiments.

(I and J) Representative velocity field from DIC images of monolayers after laser induction in control and NSC23766 treated condition. Red dot, laser irradiation point; length of vectors, proportional to their magnitude.

(K) Diagram illustrating measurement of cellular strain ( $\epsilon$ ) for the cells near and far (row1 and row4) from the apoptotic cell (blue).  $L_{t0}$  and  $L_{t30}$  represent the length of cells 0 and 30 min after apoptosis. See methods.

(L) Strain of cells in row1 and row4. Data are mean  $\pm$  s.d.; \*\*\* $P < 0.001$ , Mann–Whitney  $U$ -test.  $n = 53$  cells (row1) and  $n = 53$  cells (row4) from 7 ROIs in 3 independent experiments. Scale bars, 20  $\mu\text{m}$  in B; 50  $\mu\text{m}$  in C, E, I, and J.

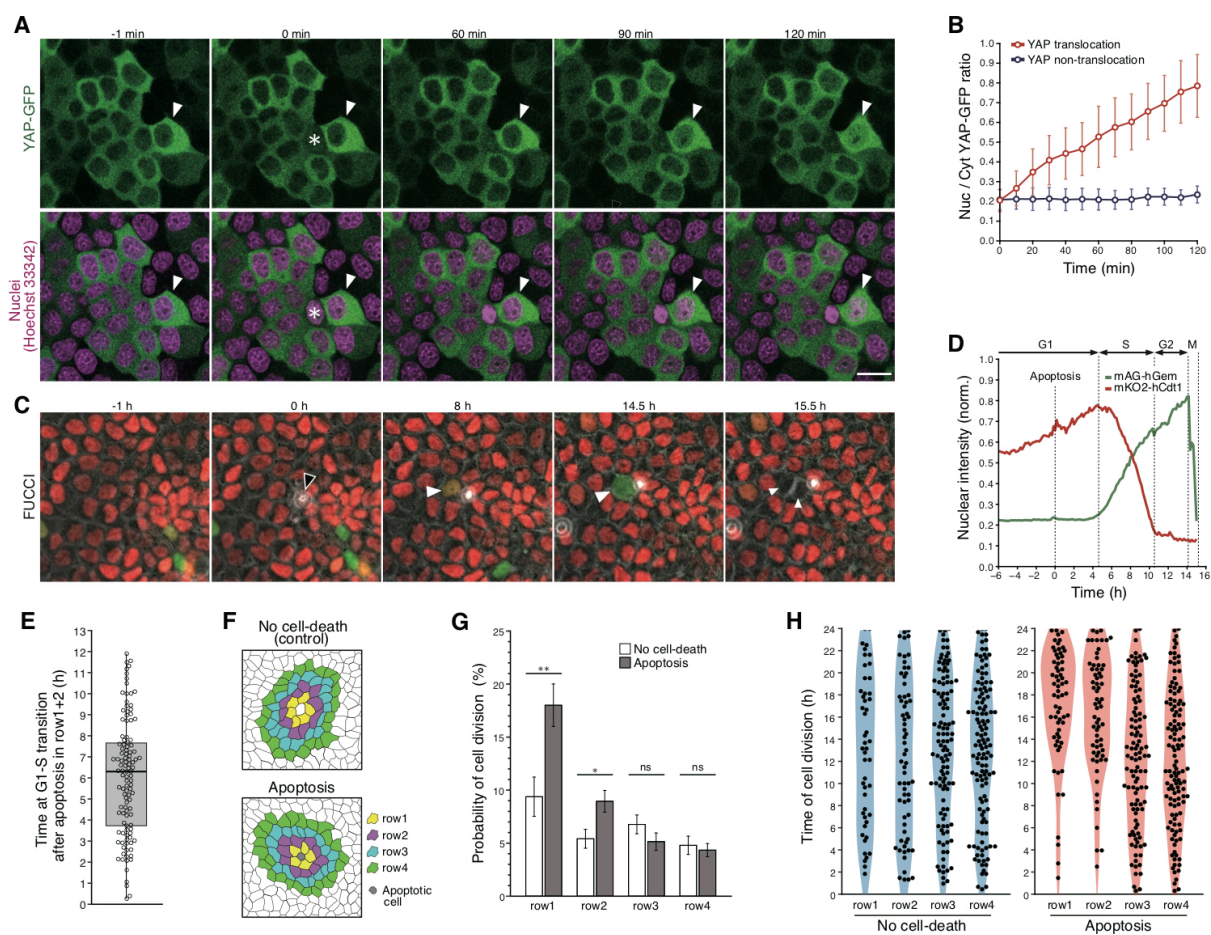

## Figure 2.

(A) Representative time series showing YAP-GFP nuclear translocation (white arrowhead) within an MDCK YAP-GFP monolayer. Time 0 min represents the time at laser induction of apoptosis (asterisk).

(B) Nuclear/cytosolic (Nuc/Cyt) YAP-GFP ratio in cells surrounding apoptotic cell after laser induction. Cells were classified as YAP translocation ( $I_{\text{nuc/cyt}} \geq 0.5$ ) or non-translocation ( $I_{\text{nuc/cyt}} < 0.5$ ) 2 h after laser induction (see Methods).  $n = 42$  cells in 10 images from 6 independent experiments.

(C) Representative time series showing a cell proliferation (white arrowhead) after apoptotic cell extrusion (black arrowhead) within an MDCK FUCCI monolayer.

(D) Normalized (norm.) fluorescence intensities of the mKO2-Cdt1 (red) and mAG-hGem (green) in a cell as shown in C (cyan arrowhead).

(E) The distribution of time at G1-S phase transition in cells surrounding the apoptotic cell.  $n = 114$  cells from 54 ROIs in 6 independent experiments.

(F) Illustration depicting segmented cells in ROIs with no dead cells or with an apoptotic cell. Cells in each row (row1-4) surrounding a central living or apoptotic cell are color-coded.

(G) Probability of cell division for each row within 24 hours after extrusion. Cells in which G1-S phase transition was detected before extrusion were excluded. Data are mean  $\pm$  s.e.m.; not significant (ns), \*\* $P = 0.0013$  and \* $P = 0.0157$ , Mann-Whitney  $U$ -test.

(H) The distribution of cell division time for each row. Time 0 h represents the time at apoptotic cell extrusion (apoptosis) or starting point (control) referring to apoptotic ROIs. Data shown in G and H are from  $n = 54$  ROIs in 6 independent experiments (control or apoptosis).

Scale bars, 20  $\mu\text{m}$  in A and C.

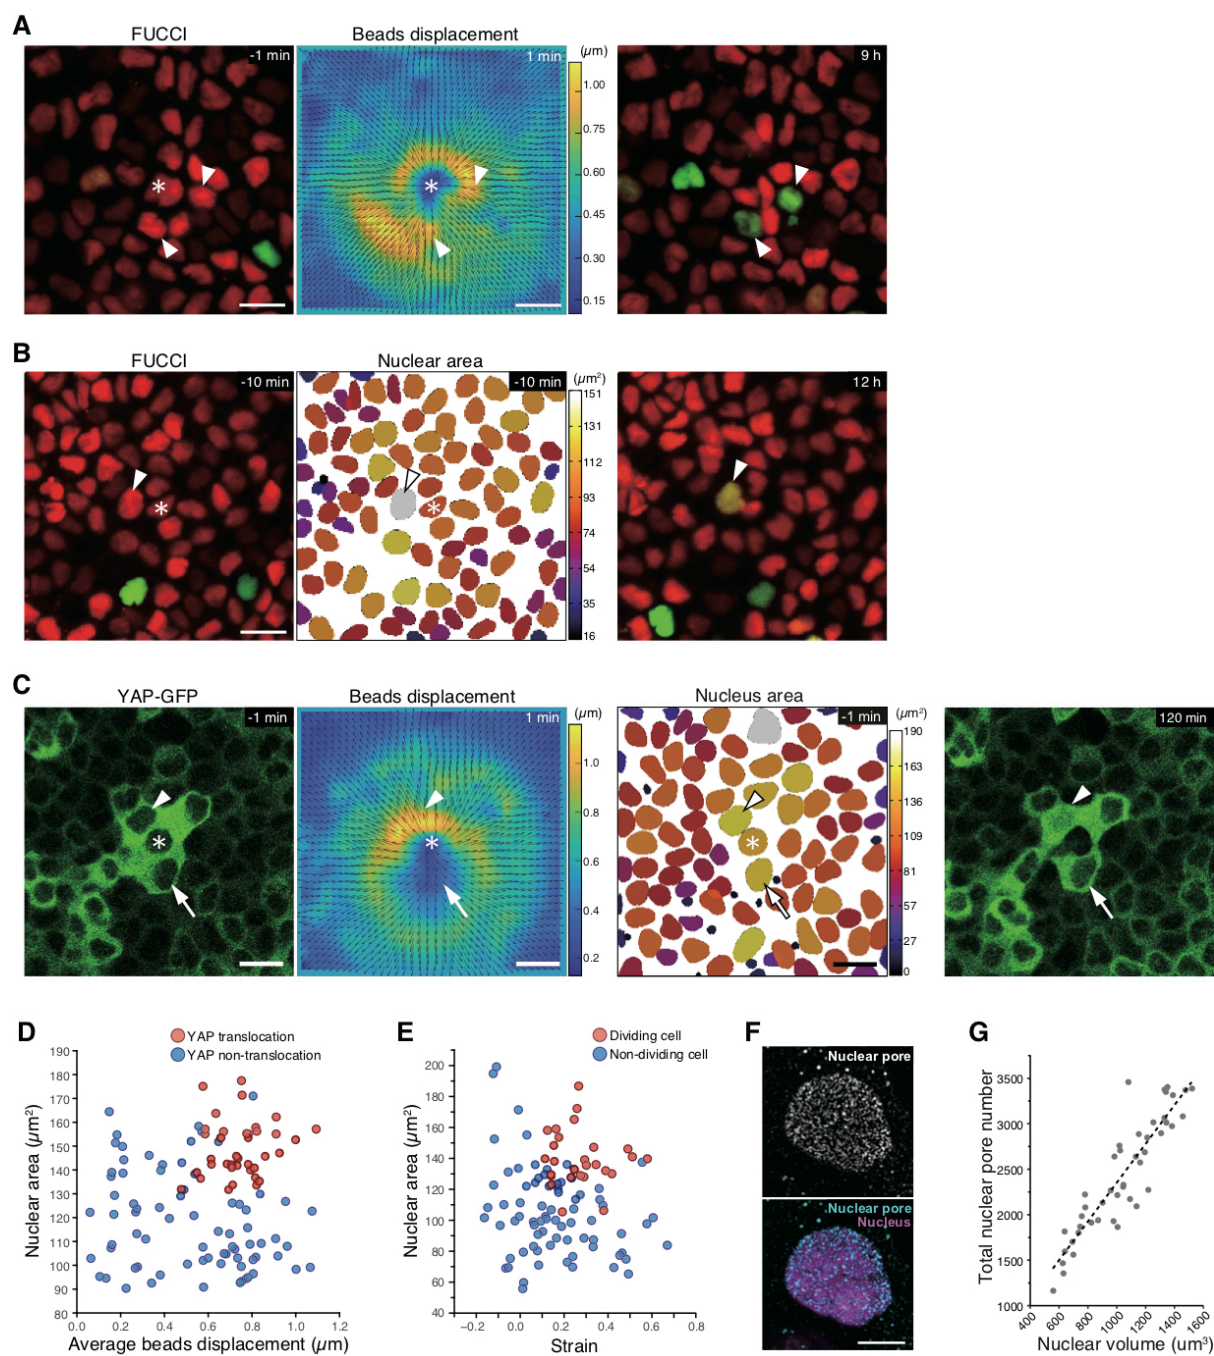

**Figure 3.**

(A and B) Representative snapshots of MDCK FUCCI monolayer before (left) and after (right) apoptotic cell extrusion, and heat map with vectors of beads displacement 1 min after extrusion in A (middle) and heat map of the cross-sectional nuclear area 10 min before extrusion in B (middle). Asterisk, apoptotic cell; white arrowhead, cells underwent cell-cycle progression and subsequent cell division (data not shown); color bars, the magnitude of the displacements in  $\mu\text{m}$  and that of the area in  $\mu\text{m}^2$ .

(C) Representative snapshots of an MDCK YAP-GFP monolayer before (left) and after (right) laser induction of apoptosis, and heat map of beads displacement and nuclear area. Asterisk, apoptotic cell; white arrowhead, YAP nuclear translocation; white arrow, YAP nuclear non-translocation.

(D) Relationship between nuclear area and average beads displacement in individual YAP-GFP<sup>+</sup> cells for rows 1-2 at 1 min after laser induction.  $n = 115$  cells in 36 images from 9 independent experiments. Cells were classified as YAP translocation ( $I_{\text{nuc/cyt}} \geq 0.5$ ) or non-translocation ( $I_{\text{nuc/cyt}} < 0.5$ ) 2 h after laser induction.

(E) Relationship between nuclear area and cellular strain for cells in row1 within MDCK FUCCI. For calculation of strain, cell length was measured at 0 and 30 min after cell extrusion. Cells were classified as dividing cells or non-division cells within 24 h after apoptotic cell extrusion.  $n = 103$  cells in 16 images from 6 independent experiments.

(F) Immunostaining for nuclear pore complex of a cell within MDCK WT monolayer.

(G) The total number of nuclear pores is linear with respect to nuclear volume.  $n = 45$  cells in 2 independent experiments.

Scale bar, 20  $\mu\text{m}$  in A-C; 10  $\mu\text{m}$  in F.

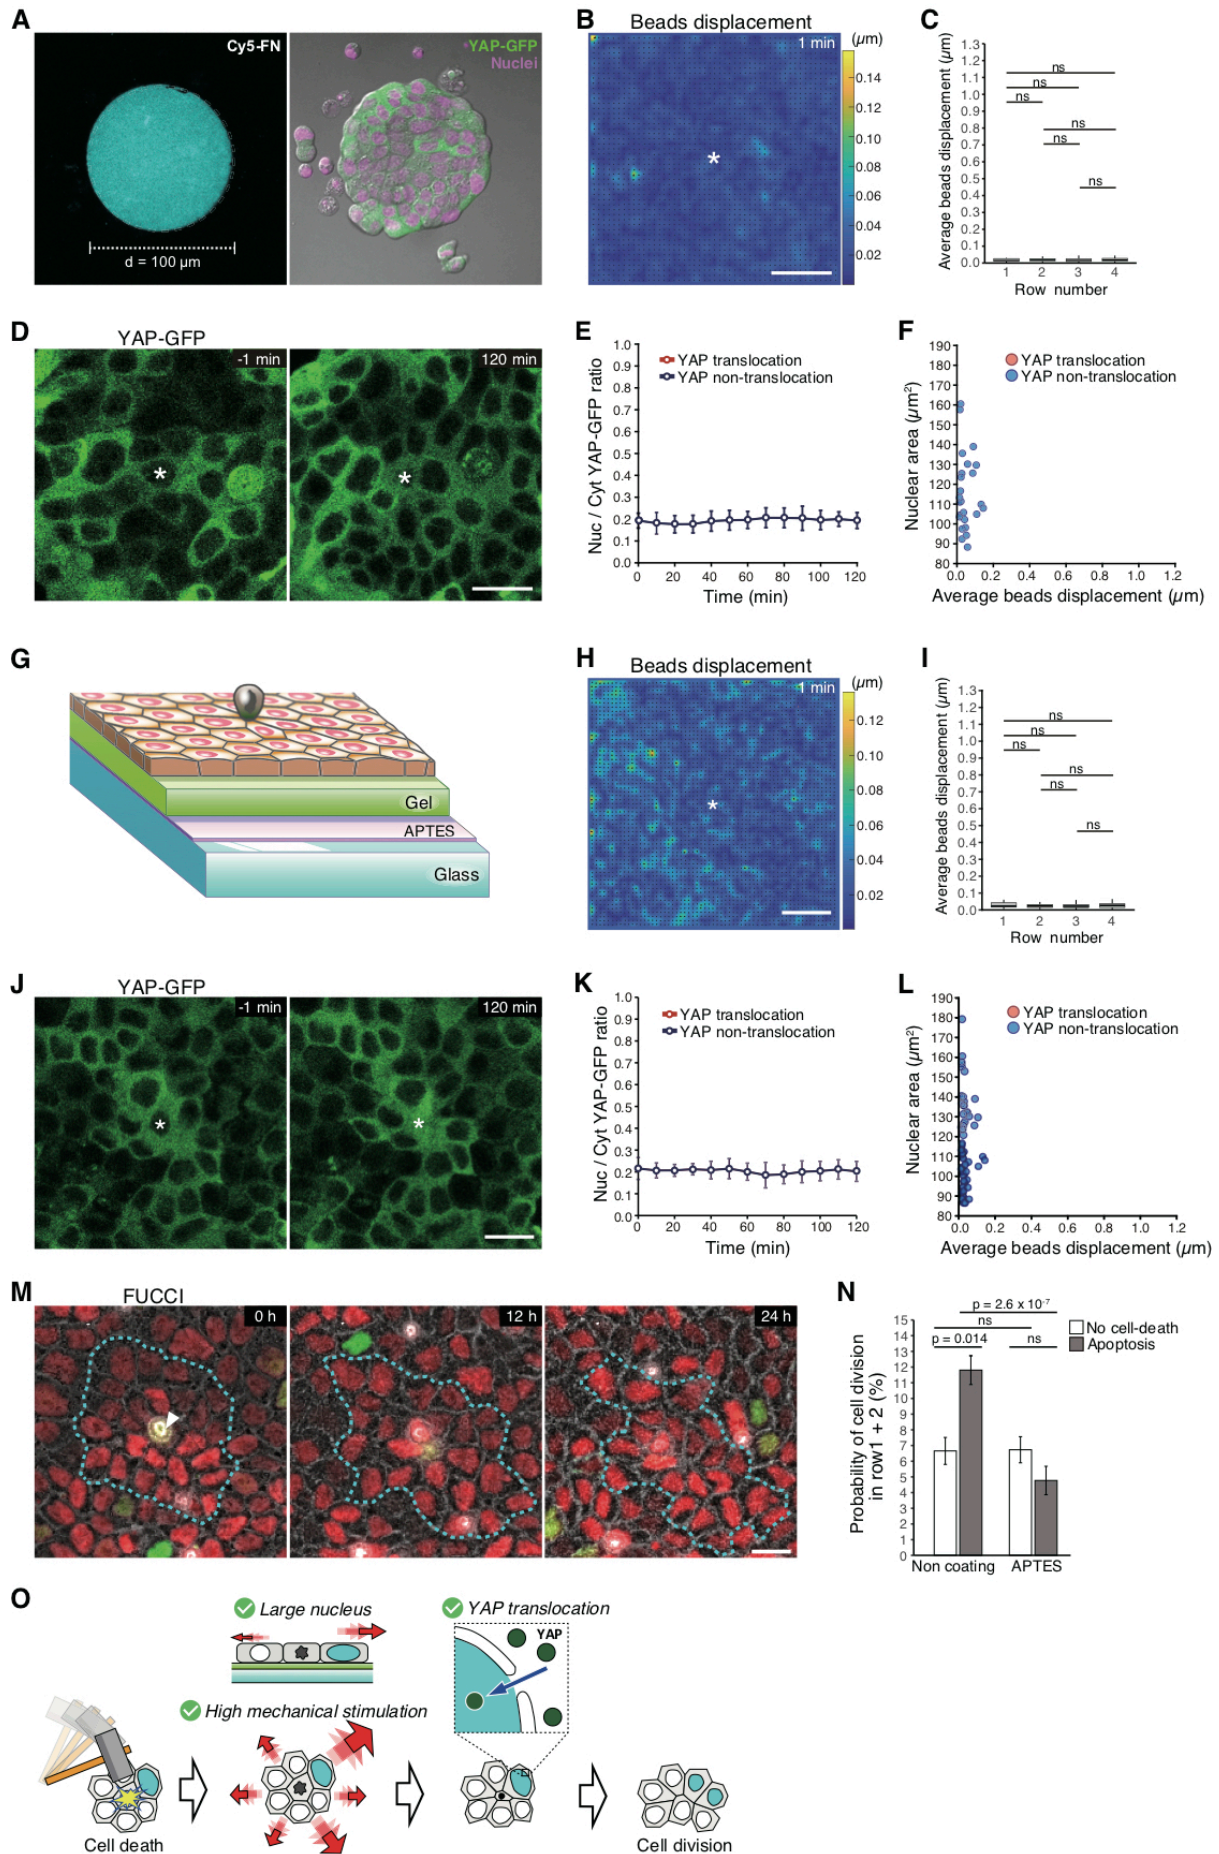



#### Figure 4.

(A) MDCK YAP-GFP mini tissue confined on 100  $\mu\text{m}$   $\Phi$  circular pattern (right). The cells are seeded on the substrate coated with Cy5 fibronectin (left, cyan). See Methods. Circular-patterned mini tissue was used in **B-F**.

(B) Heat map with vectors of beads displacement 1 min after laser induction of apoptosis in **D**. Color bar, the magnitude of beads displacements in  $\mu\text{m}$ .

(C) Average beads displacement for each row at 1 min after laser induction. Data are mean  $\pm$  s.d., one-way ANOVA, and Levene test followed by Tukey–Kramer test.  $n = 5$  ROIs in 5 independent experiments.

(D) Representative snapshots of MDCK YAP-GFP cells within a confined mini tissue before and after laser induction.

(E) Nuclear/cytosolic (Nuc/Cyt) YAP-GFP ratio in cells surrounding apoptotic cell after laser induction.  $n = 20$  cells in 6 images from 6 independent experiments.

(F) Relationship between nuclear area and average beads displacement in individual YAP-GFP<sup>+</sup> cells (in rows 1-2) at 1 min after laser induction. Cells were classified as YAP translocation ( $I_{\text{nuc/cyt}} \geq 0.5$ ) or non-translocation ( $I_{\text{nuc/cyt}} < 0.5$ ) 2 h after laser induction in **E** and **F**.  $n = 29$  cells in 6 images from 6 independent experiments.

(G) Schematic drawing of a confluent MDCK monolayer on the gel substrate which is strongly bonded to glass by APTES. APTES-coating dish overlaid with the substrate was used in **H-N**.

(H) A heat map with vectors of beads displacement 1 min after laser induction in **J**. Color bar, the magnitude of beads displacements in  $\mu\text{m}$ .

(I) Average beads displacement for each row at 1 min after laser induction. Data are mean  $\pm$  s.d., one-way ANOVA, and Levene test followed by Tukey–Kramer test.  $n = 6$  ROIs in 6 independent experiments.

(J) Representative snapshots of an MDCK YAP-GFP monolayer before and after laser induction of apoptosis.

(K) Nuclear/cytosolic (Nuc/Cyt) YAP-GFP ratio in cells surrounding apoptotic cell after laser induction.  $n = 23$  cells in 4 images from 4 independent experiments.

(L) Relationship between nuclear area and average beads displacement in individual YAP-GFP<sup>+</sup> cells within rows 1-2 at 1 min after laser induction. Cells were classified as YAP translocation ( $I_{\text{nuc/cyt}} \geq 0.5$ ) or non-translocation ( $I_{\text{nuc/cyt}} < 0.5$ ) 2 h after laser induction in **K** and **L**.  $n = 35$  cells in 5 images from 5 independent experiments.

(M) Representative time series of cells surrounding an apoptotic cell (white arrowhead) within an MDCK FUCCI monolayer. The cyan dashed line represents the boundary between row2 and row3.

(N) Probability of cell division within 24 hours for rows 1-2 in the cases of no cell death or apoptosis under different dish conditions (non-coating vs APTES-coating). Data are mean  $\pm$  s.d.; \* $P = 0.014$  and \*\*\* $P < 2.6 \times 10^{-7}$ , Kruskal–Wallis rank-sum test followed by Steel–Dwass test.  $n = 54$  ROIs in 6 independent experiments (each cases with non-coating),  $n = 54$  ROIs in 4 independent experiments (each cases with APTES-coating).

(O) A model of compensatory cell proliferation.

Asterisk in **B**, **D**, **H** and **J**, laser irradiation point; Scale bar, 20  $\mu\text{m}$ .

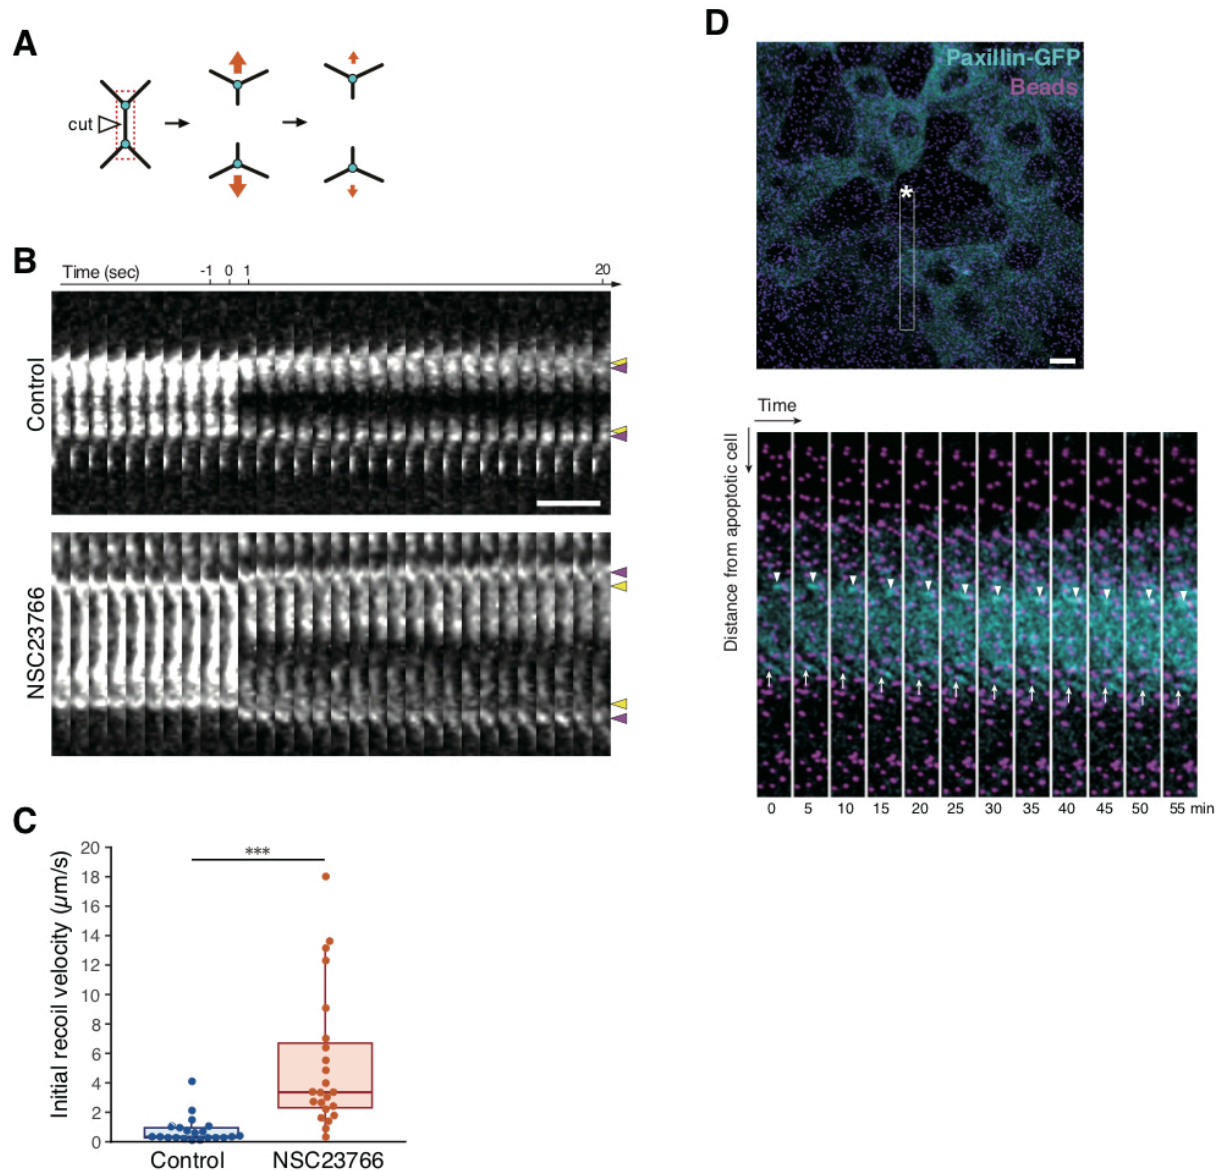

### Supplementary Figure 1

(A) Schematic diagram of laser ablation targeting cell-cell junction to measure the nodes (Y-junctions) displacement and calculate recoil velocity. Cyan dots, nodes of interest; white arrowhead, the point of laser ablation.

(B) Kymographs of adherence junction labeled with E-cadherin-GFP before and after ablation, which generated from the region in the red box in A. Yellow arrowhead, the original positions of nodes; magenta arrowhead, the final positions of nodes after ablation.

(C) Quantitation of initial recoil velocities after junctional ablation. Data are mean  $\pm$  s.d.; \*\*\* $P < 0.001$ , Mann-Whitney  $U$ -test.  $n = 21$  ROIs (control),  $n = 23$  ROIs (NSC23766).

(D) Representative snapshot of MDCK Paxillin-GFP on the gel with beads (top) and the enlarged slices of movie stills enclosed in the white box after laser induction of apoptosis (bottom). Asterisk, apoptotic cell; white arrowhead, bead; white arrow, focal adhesion labeled with Paxillin-GFP.

Scale bars, 10  $\mu\text{m}$  in B and D.

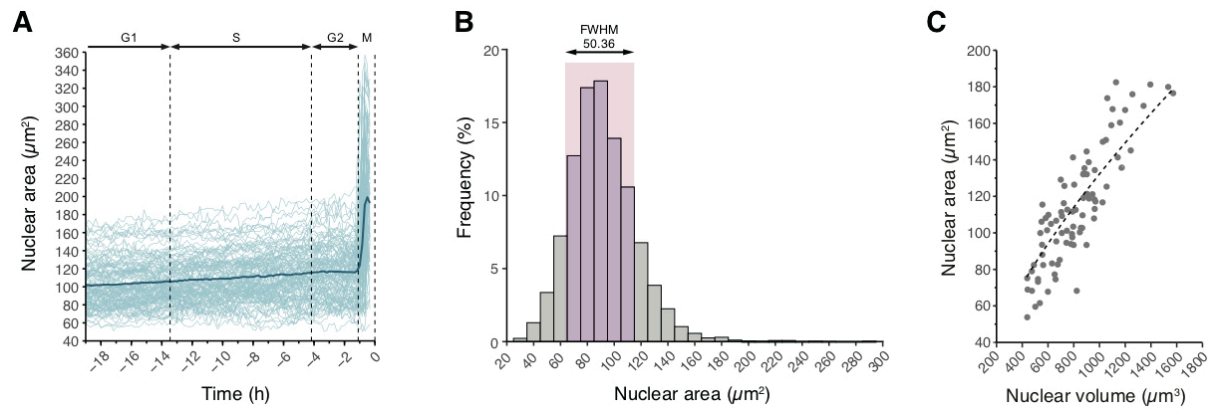

### Supplementary Figure 2

(A) Nuclear growth curves. Time 0 h is the time at cell division. The thick blue line represents mean nuclear area.  $n = 80$  cells in 14 images from 4 independent experiments.

(B) Histograms of the nuclear area within MDCK monolayers.  $n = 6719$  cells in 10 images from 3 independent experiments. FWHM, full width at half maximum.

(C) Relationship between nuclear area and nuclear volume of cells within MDCK monolayers.  $n = 86$  cells in 7 images.

## Movie legends

**Movie 1.** Beads movement (left) and heat map with vectors of radial beads displacement (right) after laser induction of apoptosis within MDCK monolayer for control. The color bar indicates the magnitude of the radial outward (red) and inward (blue) displacements in  $\mu\text{m}$ . Scale bars, 50  $\mu\text{m}$ .

**Movie 2.** Beads movement (left) and heat map with vectors of radial beads displacement (right) after laser induction of apoptosis within MDCK monolayer under NSC23766 treated condition. The color bar indicates the magnitude of the radial outward (red) and inward (blue) displacements in  $\mu\text{m}$ . Scale bars, 50  $\mu\text{m}$ .

**Movie 3.** Tissue dynamics (DIC images) and velocity field from DIC images of MDCK monolayers after laser induction for control and NSC23766 treated condition. Red dot, laser irradiation point; length of vectors, proportional to their magnitude.

**Movie 4.** Time-lapse images of MDCK YAP-GFP monolayer stained with Hoechst 33342 (magenta). Asterisk, laser irradiation point; White arrowhead, YAP-GFP nuclear translocation; scale bars, 20  $\mu\text{m}$ .

**Movie 5.** Time-lapse images of MDCK FUCCI monolayer. Black arrowhead, apoptotic cell extrusion; white arrowhead, cell proliferation; scale bars, 20  $\mu\text{m}$ .

**Movie 6.** Time-lapse images of MDCK YAP-GFP mini tissue confined on 100  $\mu\text{m}$   $\Phi$  circular pattern (left), beads movement (middle), and heat map with vectors of beads displacement (right). Asterisk, laser irradiation point; color bar, the magnitude of beads displacements in  $\mu\text{m}$ ; scale bars, 20  $\mu\text{m}$ .

**Movie 7.** Time-lapse images of MDCK YAP-GFP monolayer on the gel substrate which is strongly bonded to glass by APTES (left), beads movement (middle), and heat map with vectors of beads displacement (right). Asterisk, laser irradiation point; color bar, the magnitude of beads displacements in  $\mu\text{m}$ ; scale bars, 20  $\mu\text{m}$ . Note that a laser-irradiated cell and a neighboring cell underwent apoptosis.
